# Supplementary material for: NOTCH ligands JAG1 and JAG2 as critical pro-survival factors in childhood medulloblastoma
Source: PubMed Central journal article supplement (PMC4023630; doi:10.1186/2051-5960-2-39), 2014-04-07

**Article Title:**

**NOTCH ligands JAG1 and JAG2 as critical pro-survival factors in childhood medulloblastoma**

Journal: *Acta Neuropathologica Communications*

Authors:

Giulio Fiaschetti, Christina Schroeder, Deborah Castelletti, Alexandre Arcaro, Frank Westermann, Martin Baumgartner, Tarek Shalaby, Michael A. Grotzer\*

\*Corresponding author

Prof. Dr. Michael A. Grotzer

Department of Oncology, University Children's Hospital of Zurich, Switzerland

Email: [Michael.Grotzer@kispi.uzh.ch](mailto:Michael.Grotzer@kispi.uzh.ch)

**Supplementary Figure S1**

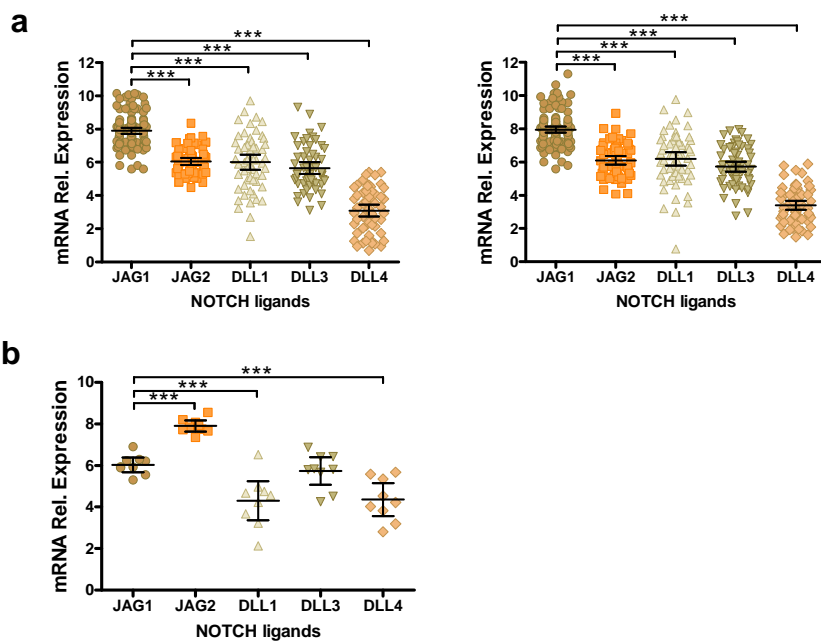

Supplement: 2051-5960-2-39-S1.pdf [file 2051-5960-2-39-S1.pdf]
