# Supplementary material for: NOTCH ligands JAG1 and JAG2 as critical pro-survival factors in childhood medulloblastoma
Source: PubMed Central journal article supplement (PMC4023630; doi:10.1186/2051-5960-2-39), 2014-04-07

# Supplementary Figure S5

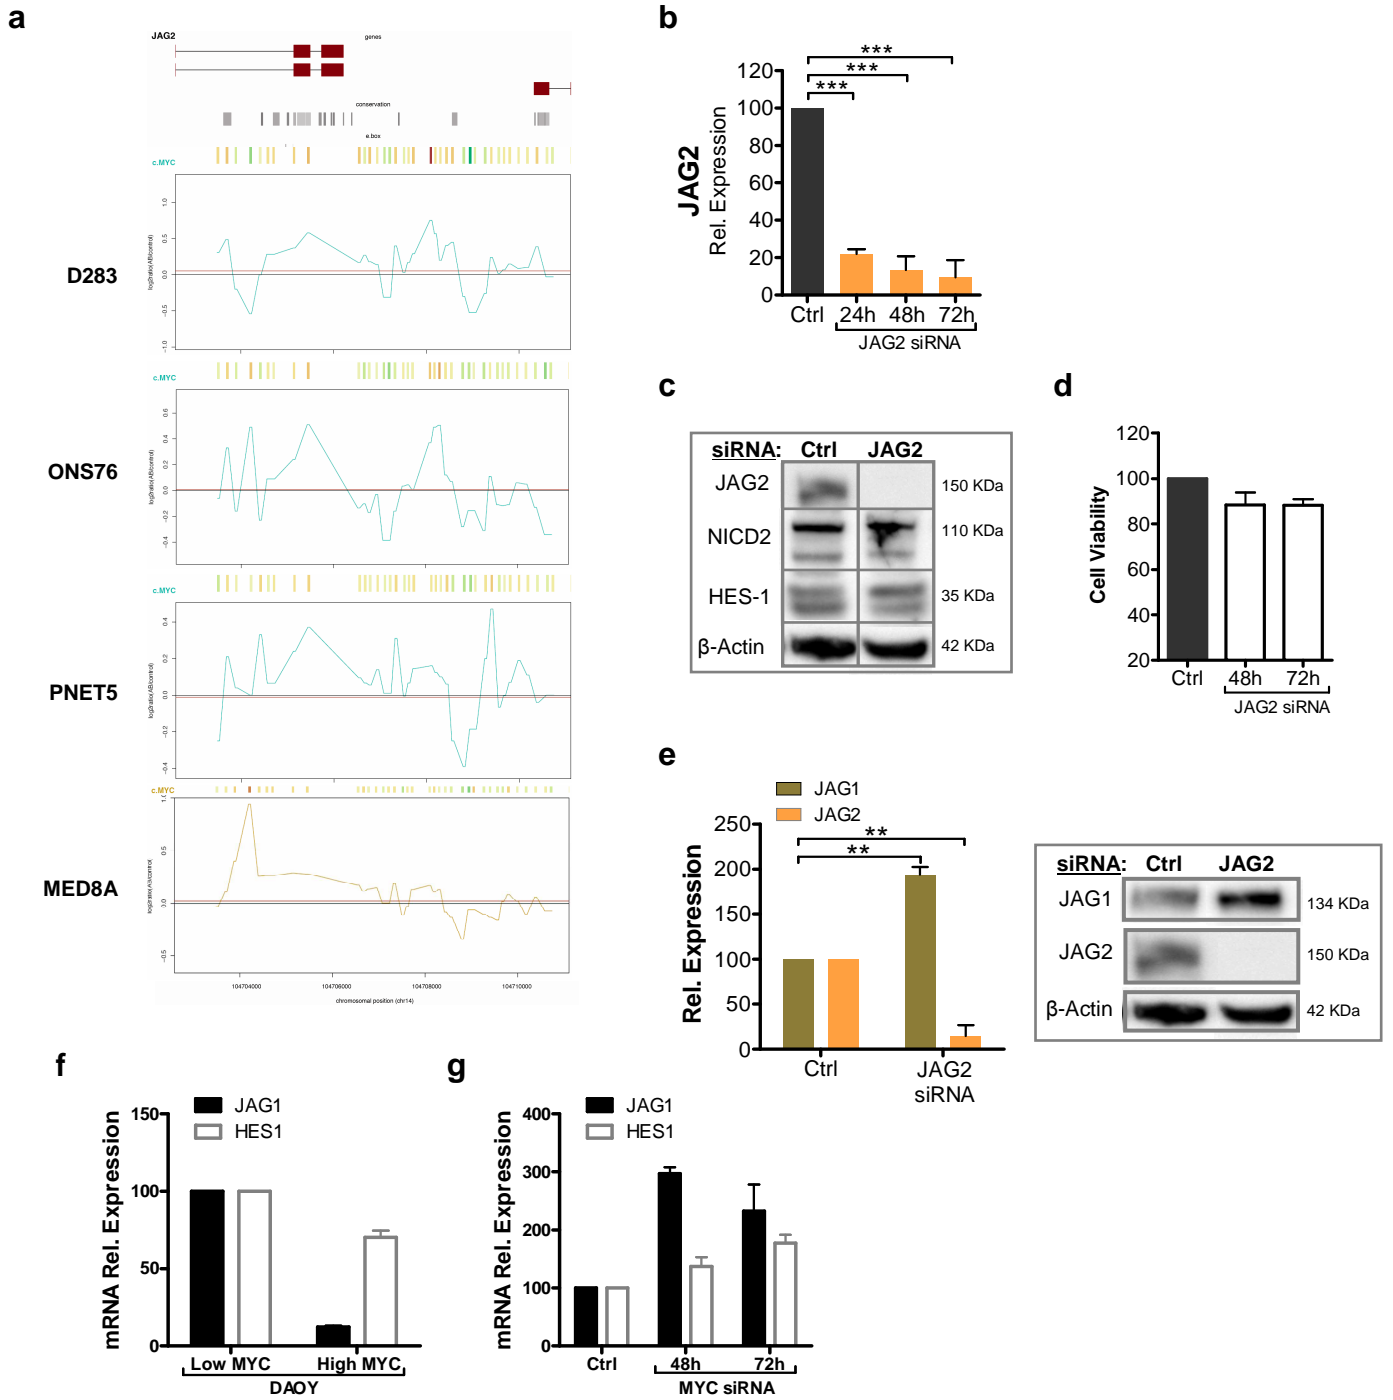

Supplement: 2051-5960-2-39-S5.pdf [file 2051-5960-2-39-S5.pdf]
